# Supplementary material for: Climatic control of the surface mass balance of the Patagonian Icefields
Source: Copernicus journal article supplement (doi:10.5194/egusphere-2022-603), 2022-07-19
Supplement: Supplementary file 1 [file egusphere-2022-603-supplement.pdf]

# Supplementary material

Tomás Carrasco-Escaff<sup>1,2</sup>, Maisa Rojas<sup>1,2</sup>, René Garreaud<sup>1,2</sup>, Deniz Bozkurt<sup>2,3</sup>, and Marius Schaefer<sup>4</sup>

<sup>1</sup>Department of Geophysics, University of Chile, Santiago, Chile

<sup>2</sup>Center of Climate and Resilience Research, University of Chile, Santiago, Chile

<sup>3</sup>Department of Meteorology, University of Valparaíso, Valparaíso, Chile

<sup>4</sup>Instituto de Ciencias Físicas y Matemáticas, Universidad Austral de Chile, Valdivia, Chile

**Correspondence:** Tomás Carrasco-Escaff (tcarrasco@dgf.uchile.cl)

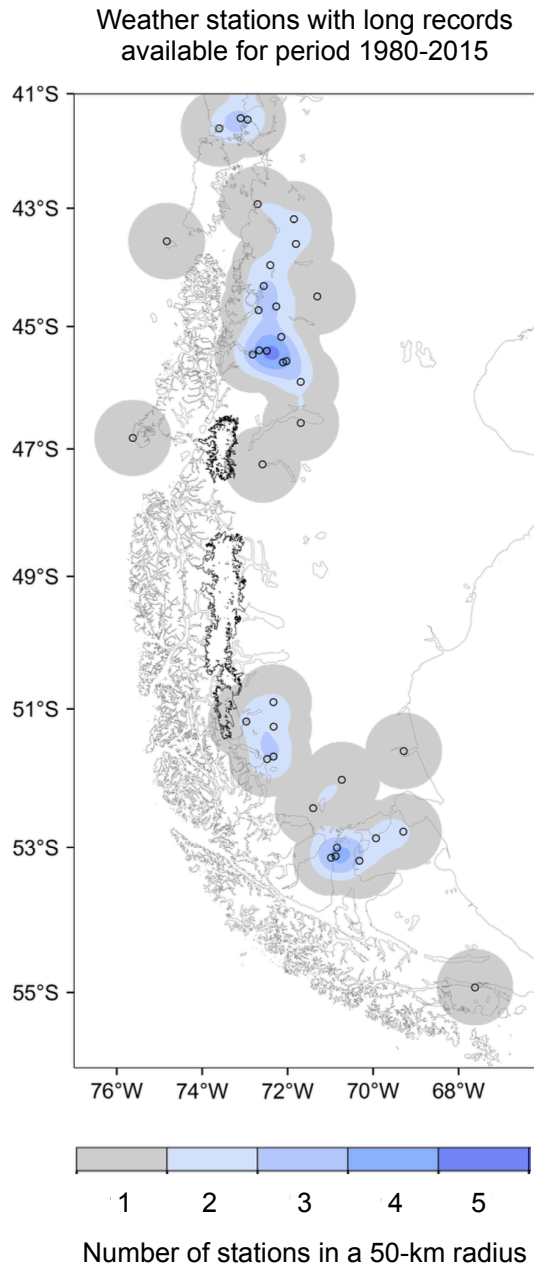

**Figure S1.** Heat map of weather stations with long records of precipitation measurements. Weather stations that register more than 75% of monthly precipitation data between 1980 and 2015 in Patagonia were used to construct the map. Colors indicate the number of station with long records in a 50 km radius. Data were obtained from the Chilean Weather Service and the National Water Agency.

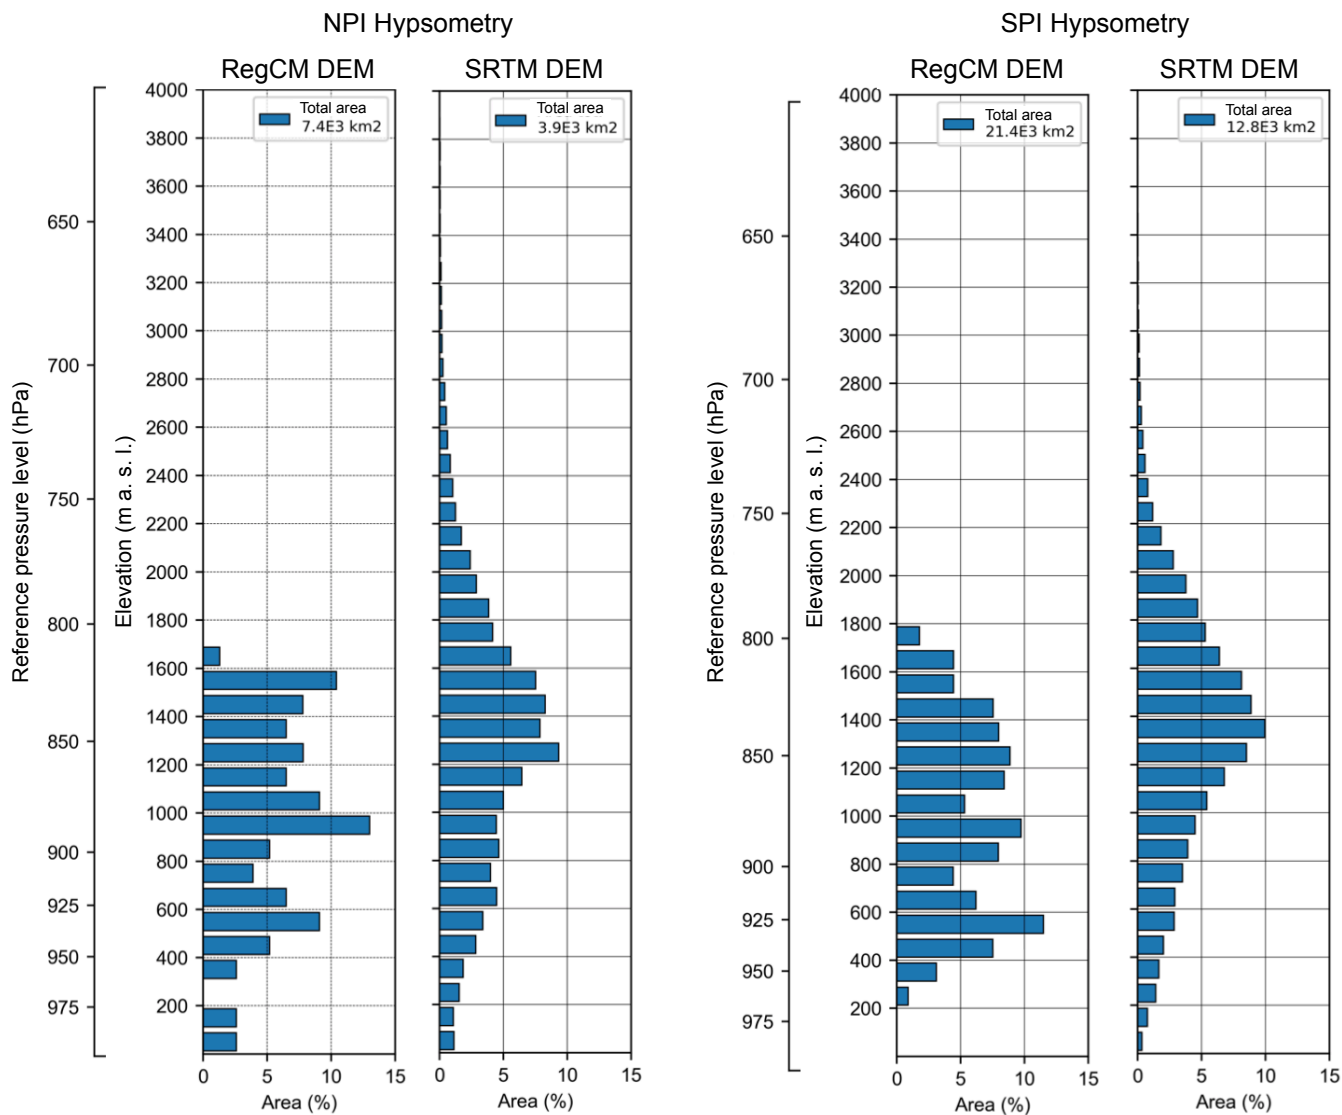

**Figure S2.** The two leftmost panels show the comparison between the NPI hypsometry obtained from the RegCMv4 DEM ( $\sim 10$  km spatial resolution) versus the one obtained from the SRTMv3 DEM ( $\sim 90$  m spatial resolution). The two rightmost panels show the same but for the SPI.

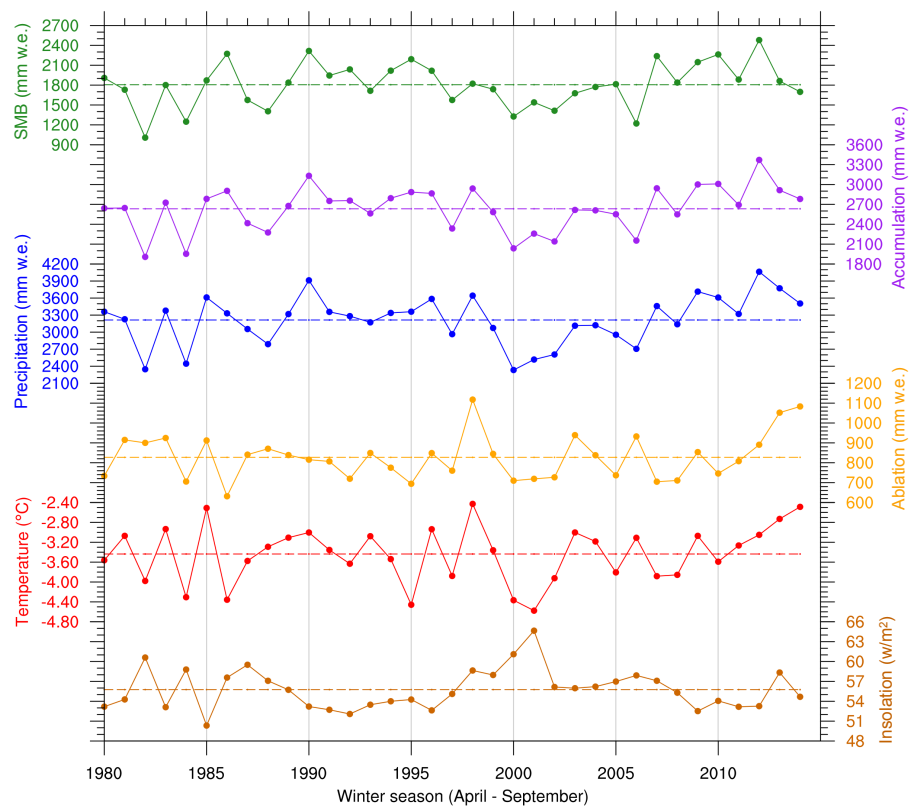

**Figure S3.** The same as in Fig. 5 but for the winter (April to September).

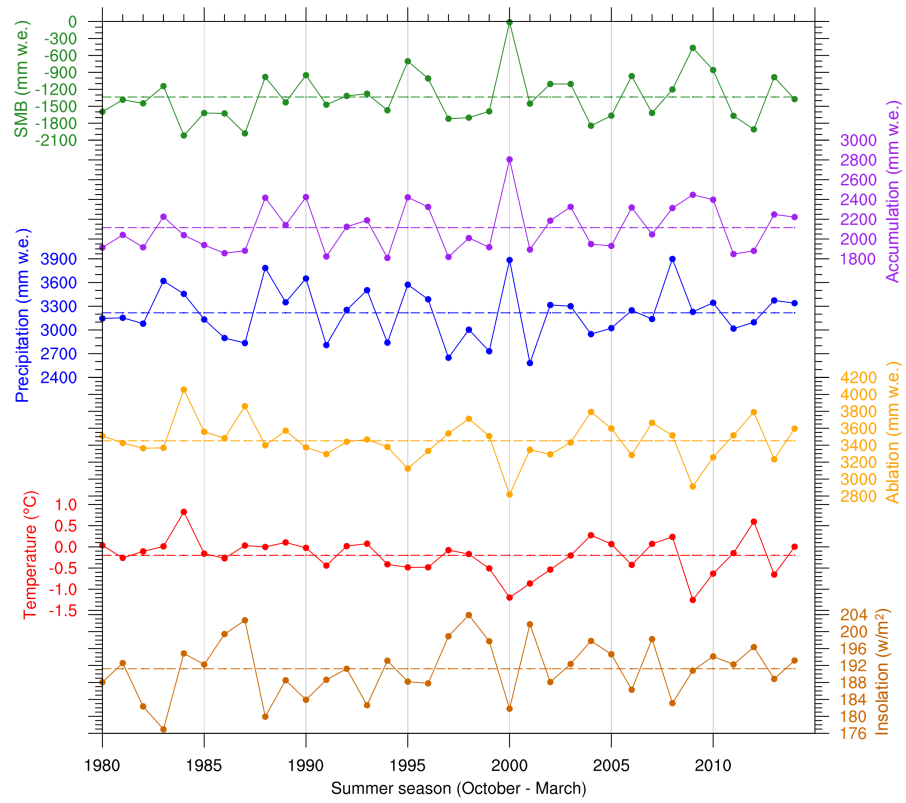

**Figure S4.** The same as in Fig. 5 but for the summer (October to March).

**Inverse of annual EP ENSO index  
projected onto annual fields of selected variables**

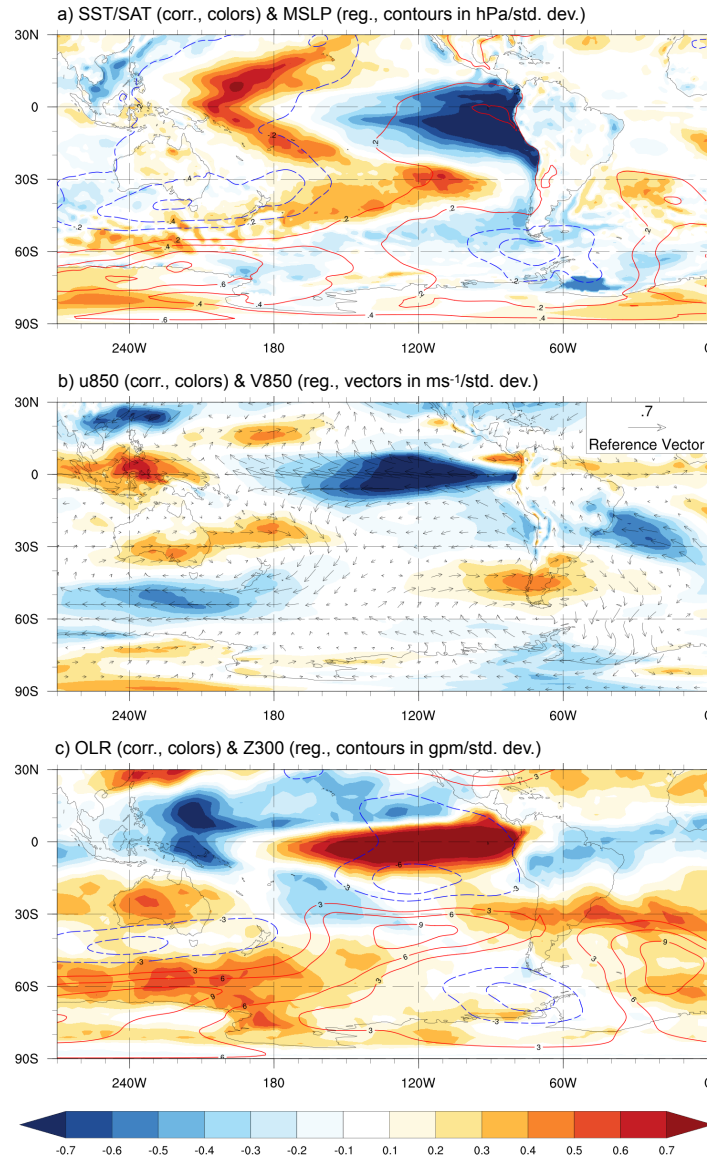

**Figure S5.** The same as in Fig. 9 but for the inverse of the annual EP ENSO index.

**Inverse of annual CP ENSO index  
projected onto annual fields of selected variables**

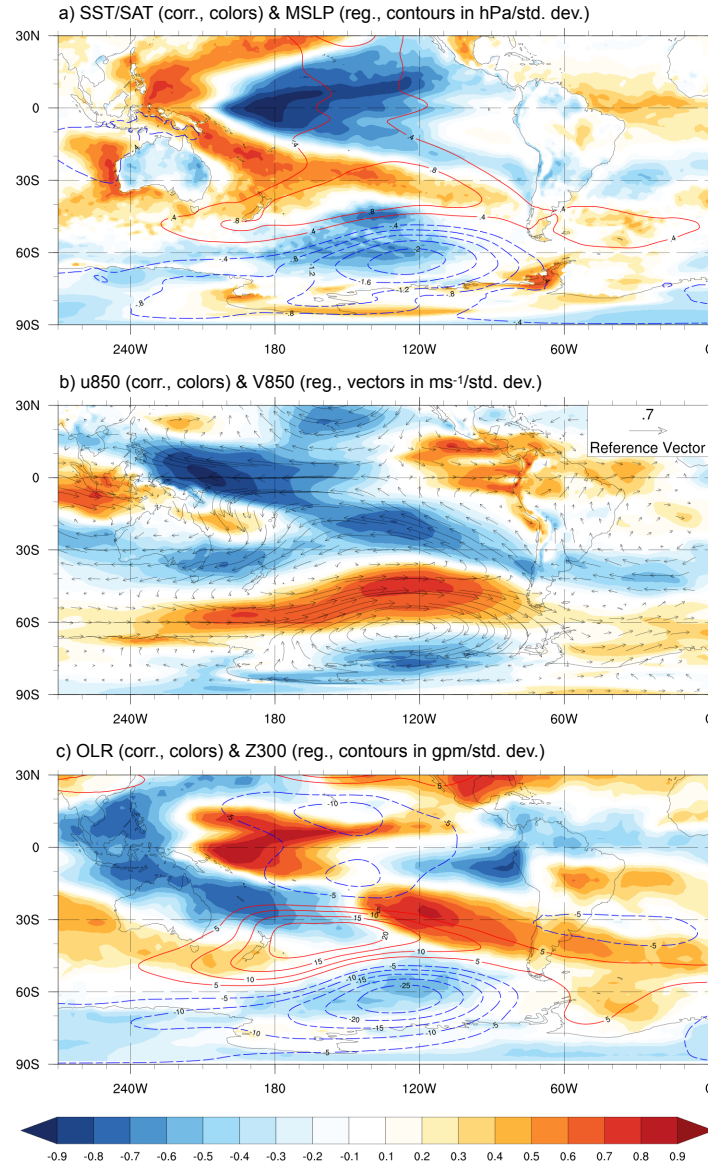

**Figure S6.** The same as in Fig. 9 but for the inverse of the annual CP ENSO index.

# **Annual AAO index projected onto annual fields of selected variables**

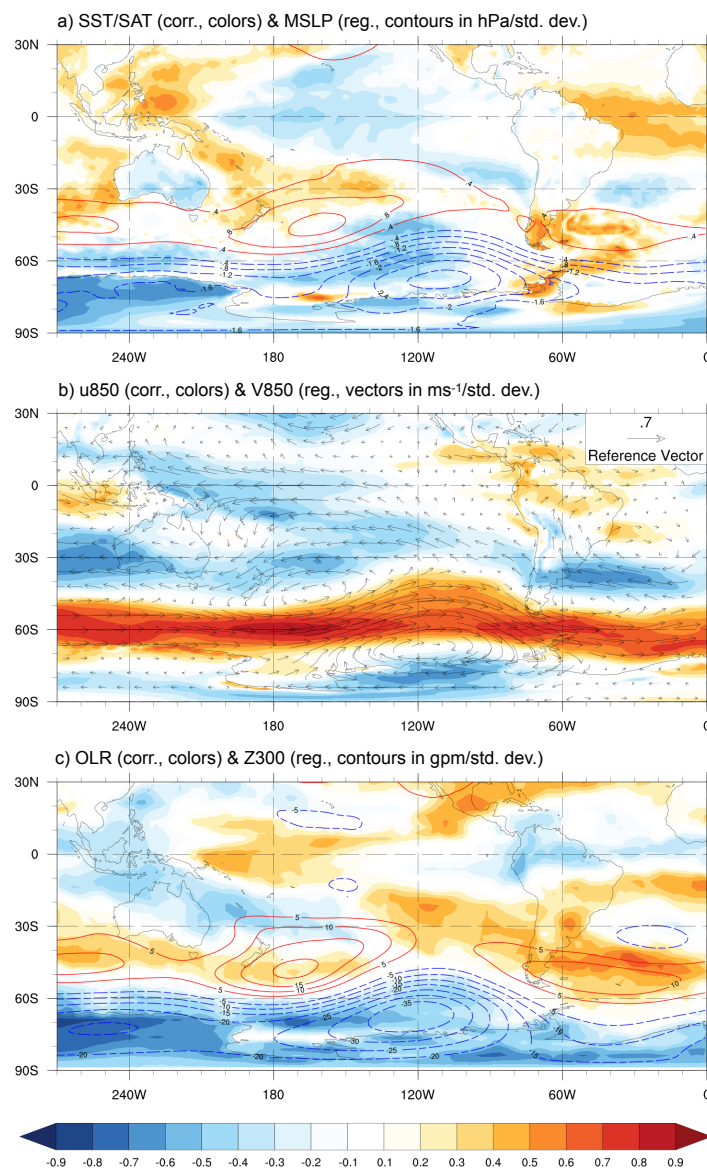

**Figure S7.** The same as in Fig. 9 but for the annual AAO index.



| Standard deviation | SMB     | Accumulation | Ablation | Precipitation | Temperature | Insolation       |
|--------------------|---------|--------------|----------|---------------|-------------|------------------|
| Units              | mm w.e. | mm w.e.      | mm w.e.  | mm w.e.       | °C          | Wm <sup>-2</sup> |
| Annual             | 537     | 403          | 272      | 536           | 0.37        | 4                |
| Winter             | 331     | 333          | 112      | 425           | 0.57        | 3                |
| Summer             | 428     | 237          | 238      | 327           | 0.42        | 7                |

**Table S1.** Standard deviations of the annual (April to March), winter (April to September) and summer (October to March) time series of the spatially averaged modeled fields.

| Winter corr.  | SMB    | Accumulation | Ablation | Precipitation | Temperature | Insolation |
|---------------|--------|--------------|----------|---------------|-------------|------------|
| SMB           | 1.00   | -            | -        | -             | -           | -          |
| Accumulation  | 0.94*  | 1.00         | -        | -             | -           | -          |
| Ablation      | -0.15  | 0.18         | 1.00     | -             | -           | -          |
| Precipitation | 0.86*  | 0.97*        | 0.32     | 1.00          | -           | -          |
| Temperature   | 0.18   | 0.46*        | 0.84*    | 0.61*         | 1.00        | -          |
| Insolation    | -0.57* | -0.59*       | -0.05    | -0.66*        | -0.48*      | 1.00       |

**Table S2.** Correlation (Pearson's r coefficient) between pairs of winter (April to September) time series of the spatially averaged modeled fields. (\*) Statistically significant value at a significance level of 5%.

| Summer corr.  | SMB    | Accumulation | Ablation | Precipitation | Temperature | Insolation |
|---------------|--------|--------------|----------|---------------|-------------|------------|
| SMB           | 1.00   | -            | -        | -             | -           | -          |
| Accumulation  | 0.90*  | 1.00         | -        | -             | -           | -          |
| Ablation      | -0.90* | -0.62*       | 1.00     | -             | -           | -          |
| Precipitation | 0.64*  | 0.83*        | -0.31    | 1.00          | -           | -          |
| Temperature   | -0.70* | -0.40*       | 0.86*    | 0.05*         | 1.00        | -          |
| Insolation    | -0.61* | -0.58*       | 0.51*    | -0.76*        | 0.08        | 1.00       |

**Table S3.** Correlation (Pearson's r coefficient) between pairs of summer (October to March) time series of the spatially averaged modeled fields. (\*) Statistically significant value at a significance level of 5%.
